# Supplementary material for: TqPCR: A Touchdown qPCR Assay with Significantly Improved Detection Sensitivity and Amplification Efficiency of SYBR Green qPCR
Source: PLoS One. 2015 Jul 14;10(7):e0132666. doi: 10.1371/journal.pone.0132666 (PMC4501803; doi:10.1371/journal.pone.0132666)
Supplement: S1 Table — (XLS) [file pone.0132666.s001.xls]

## Sheet: Suppl Table 1
Supplemental Table 1. Primers used for qPCR analysis
Name	Oligo Sequence	Accession No.
mouse Gapdh	GGCTGCCCAGAACATCAT	NM_008084
	CGGACACATTGGGGGTAG
mouse Rps13	CCCAGGTCCGTTTTGTGACT	NM_026533
	GTGCTTTCGGACAGCAACAG
mouse Hprt1	GTTGGGCTTACCTCACTGCT	NM_013556
	TAATCACGACGCTGGGACTG
mouse Axin2	CTCCCCACCTTGAATGAAGA	NM_015732
	ACTGGGTCGCTTCTCTTGAA
mouse Oct4 (Pou5f1)	CTGGGCGTTCTCTTTGGA	NM_013633
	GGCTTCCTCCACCCACTT
mouse Gbx2	TGTTCACGTTAGCAGGTTCG	NM_010262
	GGAGGTGCCTCTGAGTTCTG
mouse Neurod1	CAAAGCCACGGATCAATCTT	NM_010894
	CCCGGGAATAGTGAAACTGA
pUC19 Standard	CGGCATCAGAGCAGATTGTA	M77789
	CTGGCGTAATAGCGAAGAGG
